# Supplementary material
Source: Springer Nature journal article supplement (https://www.springermedizin.de/resource/supplementary/12933_2010_265_MOESM6_ESM.pdf/9539970)

# p-IRS-1

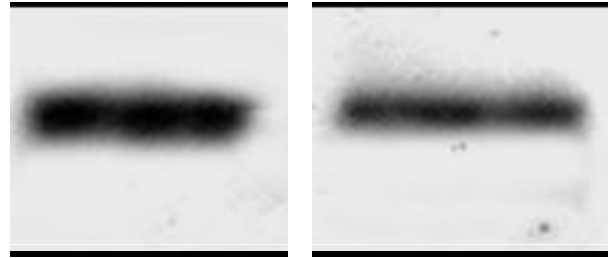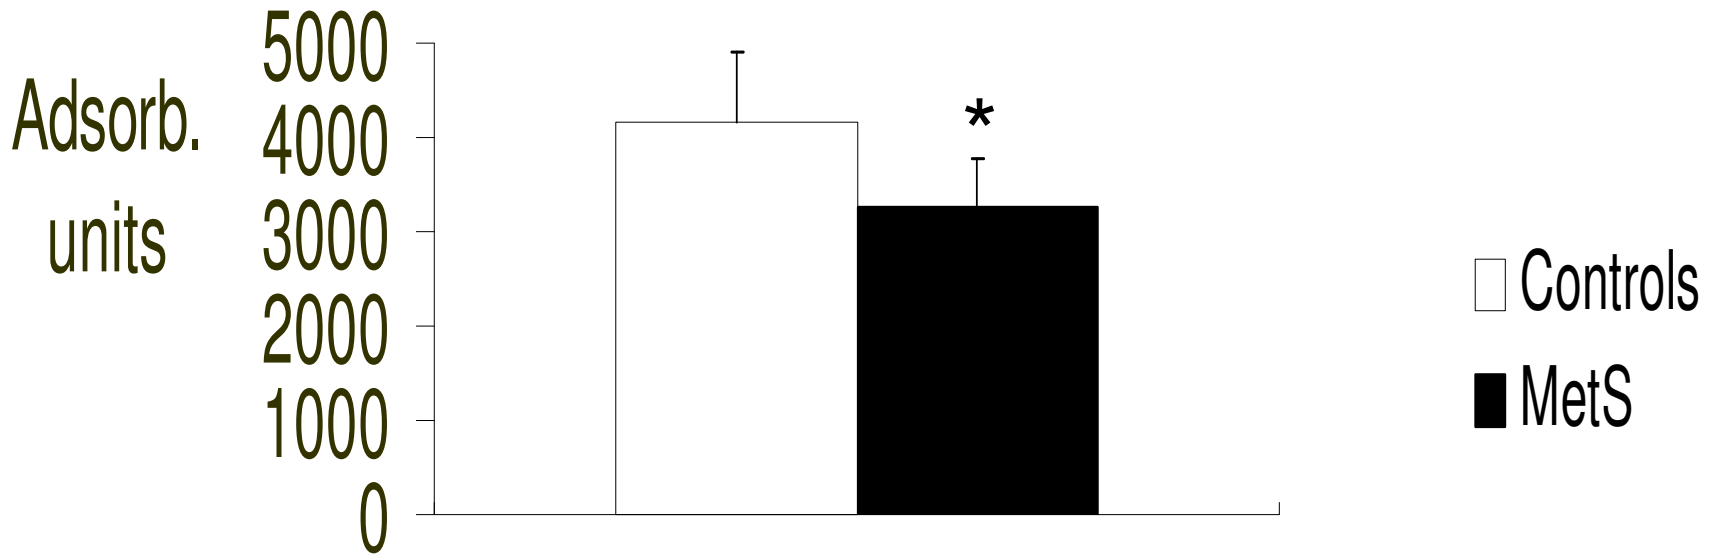

Supplement: MOESM6 [file 9539970]
